# Supplementary material for: Morphology and phase transformation from NaCaSiO3OH to Na2Ca2Si2O7 and photoluminescence evolution via Eu3+/Tb3+ doping
Source: Royal Society of Chemistry journal article supplement (doi:10.1039/c6cc06375f), 2016-01-01
Supplement: c6cc06375f1.pdf [file c6cc06375f1.pdf]

## Supporting Information

### Morphology and Phase Transformation from NaCaSiO<sub>3</sub>OH to Na<sub>2</sub>Ca<sub>2</sub>Si<sub>2</sub>O<sub>7</sub> and Photoluminescence Evolution by Eu<sup>3+</sup>/Tb<sup>3+</sup> Doping

Mingyue Chen<sup>a</sup>, Zhiguo Xia<sup>a\*</sup>, Maxim S. Molokeev<sup>b,c</sup>, Qiulin Liu<sup>a</sup>

<sup>a</sup> School of Materials Sciences and Engineering, University of Science and Technology

Beijing, Beijing 100083, China

<sup>b</sup> Laboratory of Crystal Physics, Kirensky Institute of Physics, SB RAS, Krasnoyarsk 660036,

Russia

<sup>c</sup> Department of Physics, Far Eastern State Transport University, Khabarovsk, 680021 Russia

#### Experimental Section

##### 1. NaCaSiO<sub>3</sub>OH preparation

In a typical procedure, the starting solution I was prepared by mixing 0.472 g Ca(NO<sub>3</sub>)<sub>2</sub>·4H<sub>2</sub>O into the solvent of H<sub>2</sub>O and ethanol (EtOH) (the total volume of solution, 30 mL), and the volume ratio of EtOH/H<sub>2</sub>O range from 0/30 to 30/0. The solution B was prepared by dissolved Na<sub>2</sub>SiO<sub>3</sub>·9H<sub>2</sub>O (0.682 g) in 8 mL of deionized water. Then the solution II was added into the solution I dropwise to form a mixed solution under vigorously magnetic stirring. After that, 6 g NaOH was quickly injected into the above solution, and after 10 min further stirring the resultant mixture was transferred into 50 mL stainless-steel autoclaves lined with poly(tetrafluoroethylene). The autoclave was sealed and maintained at 200 °C for 24 h and then cooled to room temperature. The products obtained at the bottom of the autoclave were collected,

washed several times with deionized water and ethanol , and dried in air. The detailed experimental parameters are listed in Table 1, and the products are denoted as S1-S8.

## **2. Preparation of $\text{Eu}^{3+}/\text{Tb}^{3+}$ and $\text{Eu}^{3+},\text{Tb}^{3+}$ co-doped in $\text{Na}_2\text{Si}_2\text{O}_7$**

First, the precursor  $\text{NaCaSiO}_3\text{OH}:\text{Eu}^{3+}$ ,  $\text{NaCaSiO}_3\text{OH}:\text{Tb}^{3+}$  and  $\text{NaCaSiO}_3\text{OH}:\text{Eu}^{3+},\text{Tb}^{3+}$  were prepared in a similar procedure except that  $\text{Eu}(\text{NO}_3)_3$  or  $\text{Tb}(\text{NO}_3)_3$  together with  $\text{Ca}(\text{NO}_3)_2$  were the starting materials added to  $\text{H}_2\text{O}$  and  $\text{EtOH}$ . Then, the final products ( $\text{Eu}^{3+}/\text{Tb}^{3+}$  and  $\text{Eu}^{3+},\text{Tb}^{3+}$  co-doped in  $\text{Na}_2\text{Si}_2\text{O}_7$ ) were obtained through a heat treatment for the corresponding precursor at  $700\text{ }^\circ\text{C}$  in air for 4 h.

## **3. Characterization**

The powder X-ray diffraction (XRD) profile was measured using D8 Advance diffractometer (Bruker Corporation, Germany) with a monochromatized source of  $\text{CuK}\alpha$  radiation ( $\lambda = 1.5406\text{ \AA}$ ) at 40 kV and 35 mA. The morphology and crystalline size of the  $\text{NaCaSiO}_3\text{OH}$  samples were determined by scanning electron microscope (SEM, JEOL JSM-6510). Thermogravimetric analysis and differential scanning calorimetry (TG–DSC) were performed on a Setaram Labsys Evo at  $10\text{ }^\circ\text{C min}^{-1}$  in an air flow from room temperature to  $650\text{ }^\circ\text{C}$ . The situ variable temperature X-ray diffraction measurement (VT-XRD) were performed in X'Pert MRD diffractometer with a high-temperature reactor chamber (AntonPaar XRK 900) attached. Samples were measured from  $2\theta = 10^\circ$  to  $60^\circ$  at a count rate of 3 s per step of  $0.05^\circ$ . Fluorescence spectrophotometer (F-4600, HITACHI, Japan), equipped with a

photomultiplier tube operating at 400 V, and a 150 W xenon lamp as the excitation source, was used to measure the room-temperature photoluminescence emission (PL) and photoluminescence excitation (PLE) spectra.

**Table S1.** Summary of the experimental conditions and the corresponding denotations for the final samples

| Sample | EtOH /H <sub>2</sub> O (mL) | NaOH (g) | Temp (°C) | Time (h) |
|--------|-----------------------------|----------|-----------|----------|
| 1      | 0/30                        | 6        | 200       | 24       |
| 2      | 1/29                        | 6        | 200       | 24       |
| 3      | 5/25                        | 6        | 200       | 24       |
| 4      | 10/20                       | 6        | 200       | 24       |
| 5      | 15/15                       | 6        | 200       | 24       |
| 6      | 20/10                       | 6        | 200       | 24       |
| 7      | 25/5                        | 6        | 200       | 24       |
| 8      | 30/0                        | 6        | 200       | 24       |

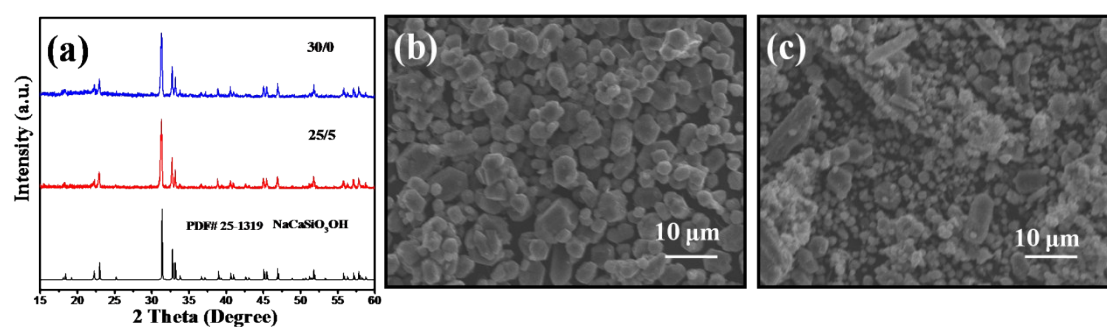

**Fig.S-1** XRD patterns of as-prepared NaCaSiO<sub>3</sub>OH (a) with various volume ratios of EtOH to H<sub>2</sub>O, 25/5 and 30/0. The standard data for NaCaSiO<sub>3</sub>OH (JCPDS card no. 25-1319) is shown as a reference. The SEM images of NaCaSiO<sub>3</sub>OH samples prepared in EtOH/H<sub>2</sub>O = 25/5 (b) and 30/0 (c).

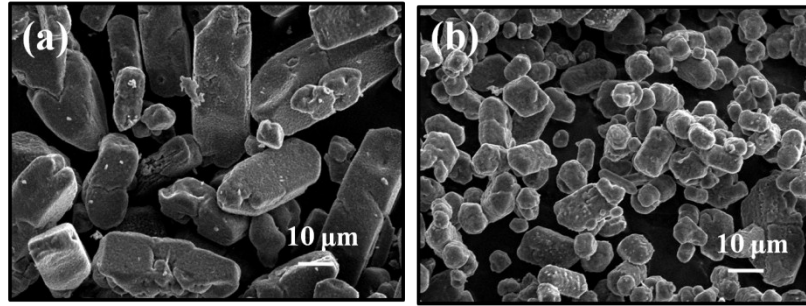

**Fig.S-2** The SEM images for synthesis  $\text{Na}_2\text{Ca}_2\text{Si}_2\text{O}_7$  via heat-treatment in air of  $\text{NaCaSiO}_3\text{OH}$  precursors  $\text{EtOH}/\text{H}_2\text{O} = 15/20$  (a) and  $20/10$  (b) at  $1000\text{ }^\circ\text{C}$

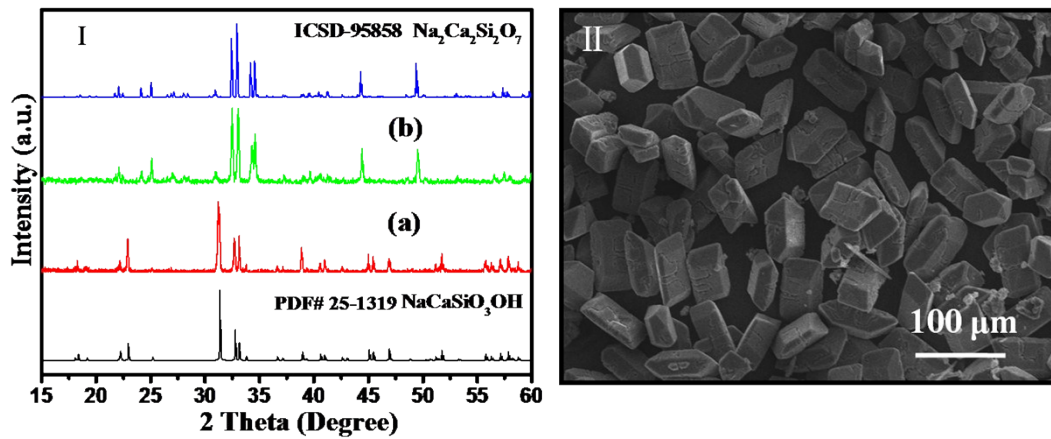

**Fig.S-3** XRD patterns-I of as-prepared  $\text{NaCaSiO}_3\text{OH}:0.03\text{Tb}^{3+},0.08\text{Eu}^{3+}$  (a) and  $\text{Na}_2\text{Ca}_2\text{Si}_2\text{O}_7:0.03\text{Tb}^{3+},0.08\text{Eu}^{3+}$  (b) phosphors. The standard data for  $\text{NaCaSiO}_3\text{OH}$  (JCPDS card no. 25-1319) and  $\text{Na}_2\text{Ca}_2\text{Si}_2\text{O}_7$  (ICSD card no. 95858) are shown as a reference. The SEM image-II of  $\text{NaCaSiO}_3\text{OH}:0.03\text{Tb}^{3+},0.08\text{Eu}^{3+}$  sample prepared in  $\text{EtOH}/\text{H}_2\text{O} = 5/25$ .
